# Supplementary material for: Chronic Regulation of miR-124-3p in the Perilesional Cortex after Experimental and Human TBI
Source: PubMed Central journal article supplement (PMC7177327; doi:10.3390/ijms21072418), 2020-03-31
Supplement: ijms-21-02418-s001.pdf [file ijms-21-02418-s001.pdf]

## Supplementary Materials

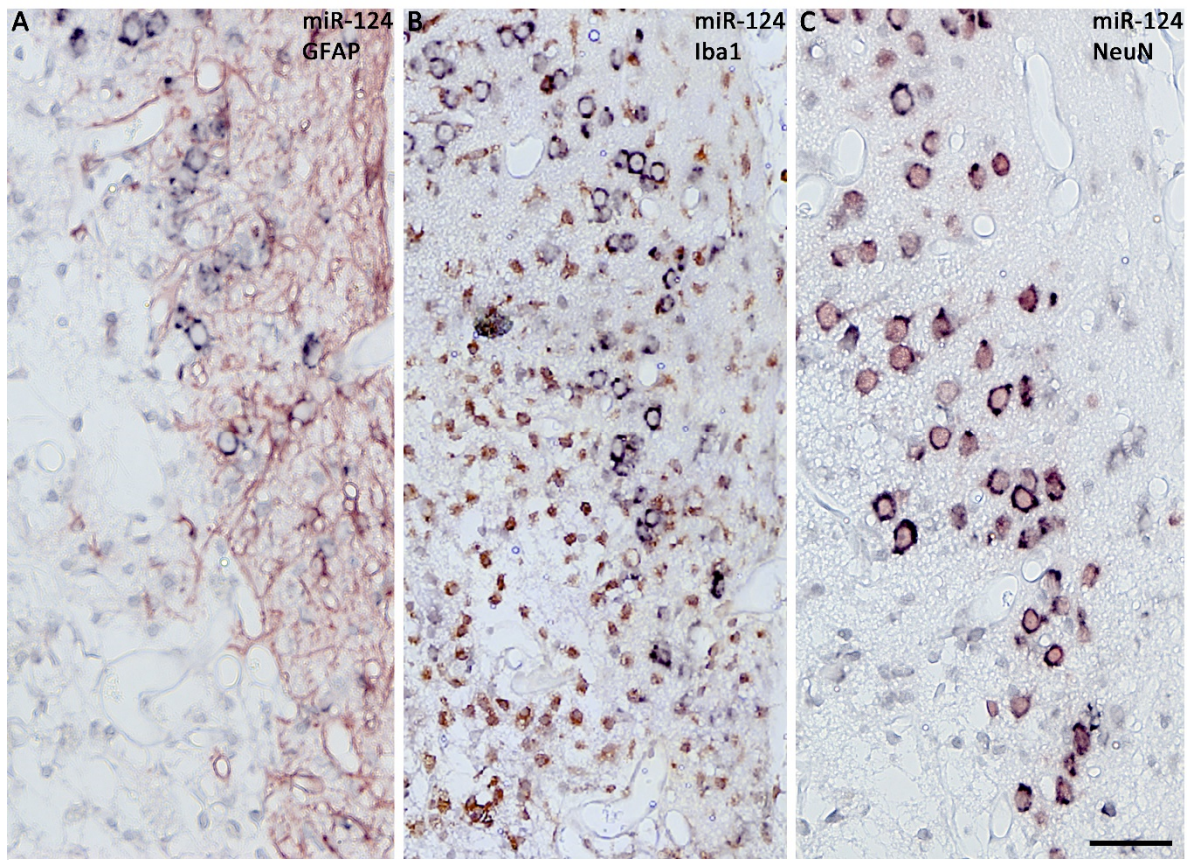

**Supplementary Figure S1.** Post-TBI localization of miR-124-3p in rat perilesional cortex. *In situ* hybridization of miR-124-3p and double-labeling with glial fibrillary acidic protein (GFAP; **A**, astrocytes), Iba1 (**B**, microglia), and NeuN (**C**, neurons) shows that miR-124-3p was expressed exclusively in neurons. Scale bar 50  $\mu$ m.

### A Upregulated targets

miRNA  
mRNA

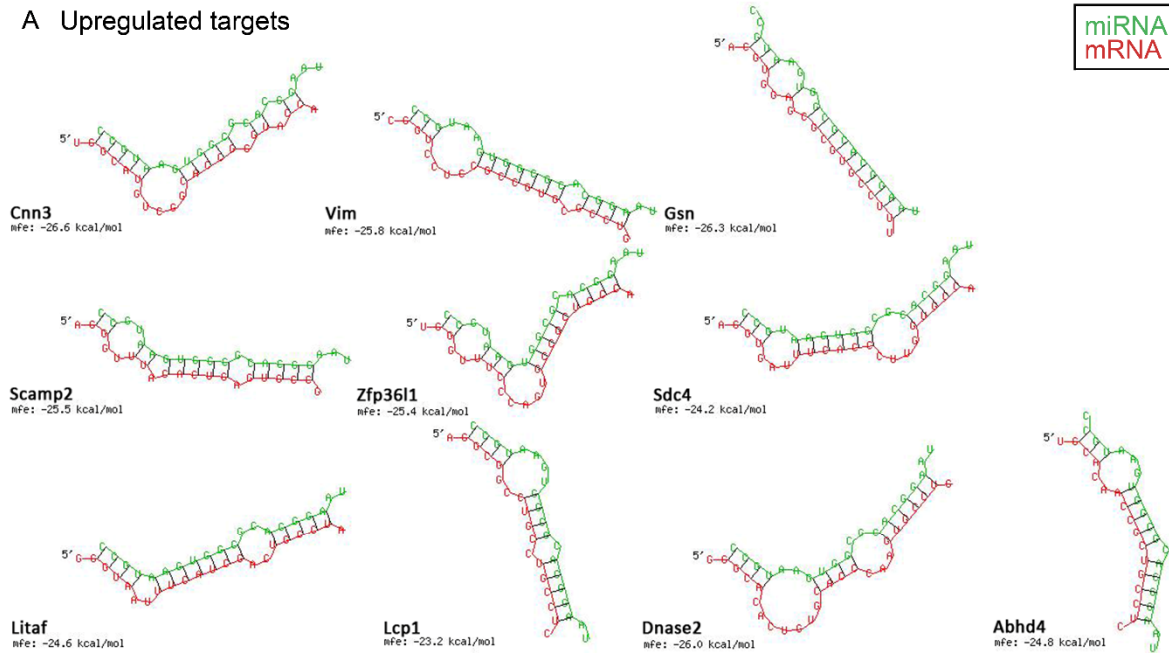

### B Downregulated targets

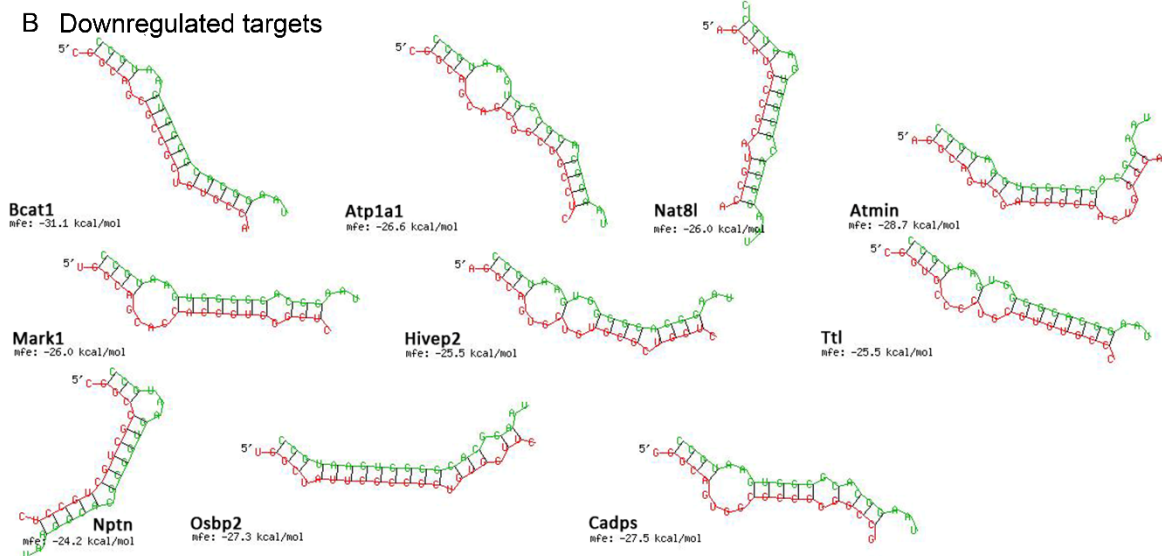

### C

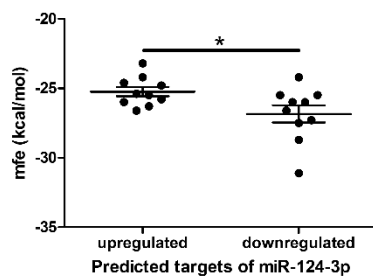

### D

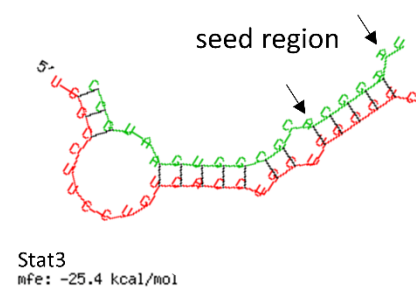

**Supplementary Figure S2.** Binding of miR-124-3p to the top 10 upregulated and downregulated targets on the basis of Gene Set Enrichment Analysis. RNAhybrid analysis on the top 10 upregulated (A) and downregulated (B) targets of miR-124-3p revealed that the downregulated targets had a lower minimum free energy compared with upregulated targets (C,  $p < 0.05$ ), indicating stronger bonds between these targets and miR-124-3p. Interestingly, the analysis indicated that in all investigated targets, miRNA bound to the target from nucleotides 3-4. (D) This was also the case with Stat3.

Abbreviations: Abhd4, abhydrolase domain containing 4; Atmin, ATM interactor; Atp1a1, ATPase Na<sup>+</sup>/K<sup>+</sup> transporting subunit alpha 1; Bcat1, branched chain amino acid transaminase 1; Cadps, calcium dependent secretion activator; Cnn3, calponin 3; Dnase2, deoxyribonuclease 2; Gsn, gelsolin; Hivep2, HIVEP zinc finger 2; Lcp1, lymphocyte cytosolic protein 1; Litaf, lipopolysaccharide-induced TNF factor; Mark1, microtubule affinity regulating kinase 1; Nat8l, N-acetyltransferase 8-like; Nptn, neuroplastin; Osbp2, oxysterol binding protein 2; Scamp2, secretory carrier membrane protein 2; Sdc4, syndecan 4; Stat3, Signal transducer and activator of transcription 3; Ttl, tubulin tyrosine ligase; Vim, vimentin; Zfp361l, zinc finger protein 36, C3H type-like 1. Statistical significance: \*<0.05 (Mann-Whitney U).

**Supplementary Table S1.** Proteins linked with processing of pre-miRNA to mature miRNA [44] and their expression in perilesional cortex at 3 months post-TBI.

| Gene name | Gene annotation                                                | <i>p</i> -value | log2FoldChange |
|-----------|----------------------------------------------------------------|-----------------|----------------|
| ADAR      | adenosine deaminase, RNA-specific                              | 0.276           | -0.115         |
| AGO1      | argonaute RISC component 1                                     | 0.415           | -0.110         |
| AGO2      | Argonaute RISC catalytic component 2                           | 0.070           | -0.264         |
| AGO3      | Argonaute RISC catalytic component 3                           | 0.134           | -0.285         |
| AGO4      | Argonaute RISC component 4                                     | 0.109           | -0.251         |
| BCDIN3D   | BCDIN3 domain containing RNA methyltransferase                 | 0.137           | -0.173         |
| DICER1    | Dicer 1 ribonuclease III                                       | 0.608           | -0.040         |
| DROSHA    | Drosha ribonuclease III                                        | 0.166           | -0.089         |
| LIN28A    | Lin-28 homolog A                                               | 0.250           | 0.322          |
| LIN28B    | Lin-28 homolog B                                               | 0.180           | -0.380         |
| MRPL44    | Mitochondrial ribosomal protein L44                            | 0.024           | -0.177         |
| PRKRA     | Protein activator of interferon induced protein kinase EIF2AK2 | 0.265           | 0.113          |
| TARBP2    | TARBP2 subunit of RISC loading complex                         | 0.140           | -0.167         |
| TUT4      | terminal uridylyl transferase 4                                | NA              | NA             |
| TUT7      | Terminal uridylyl transferase 7                                | NA              | NA             |

[44] L. He and G. J. Hannon, "MicroRNAs: small RNAs with a big role in gene regulation," *Nat. Rev. Genet.*, vol. 5, no. 7, pp. 522–531, Jul. 2004, doi: 10.1038/nrg1379.
